# Supplementary material
Source: PubMed Central journal article supplement (PMC3844014)
Supplement: NIHMS502959-supplement-Supp_Figure_S1-S9.pdf [file NIHMS502959-supplement-Supp_Figure_S1-S9.pdf]

# Supplemental Figure 1

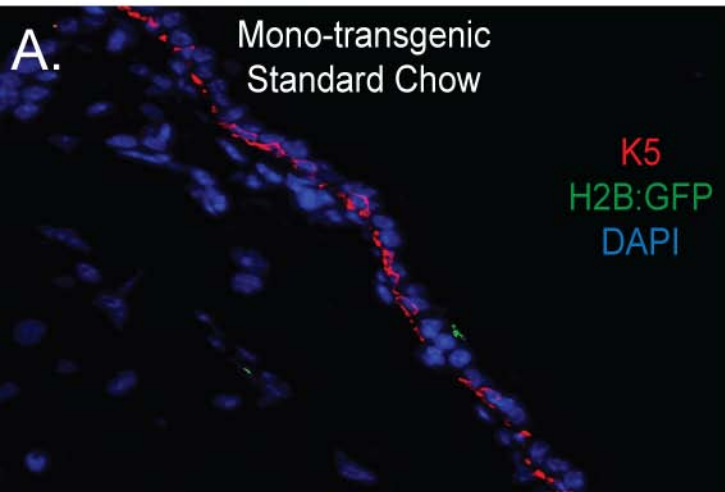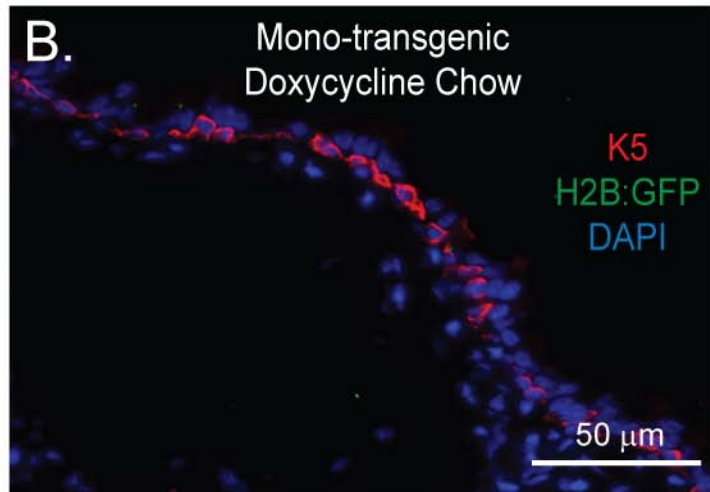

# Supplemental Figure 2

K5 BrdU DAPI

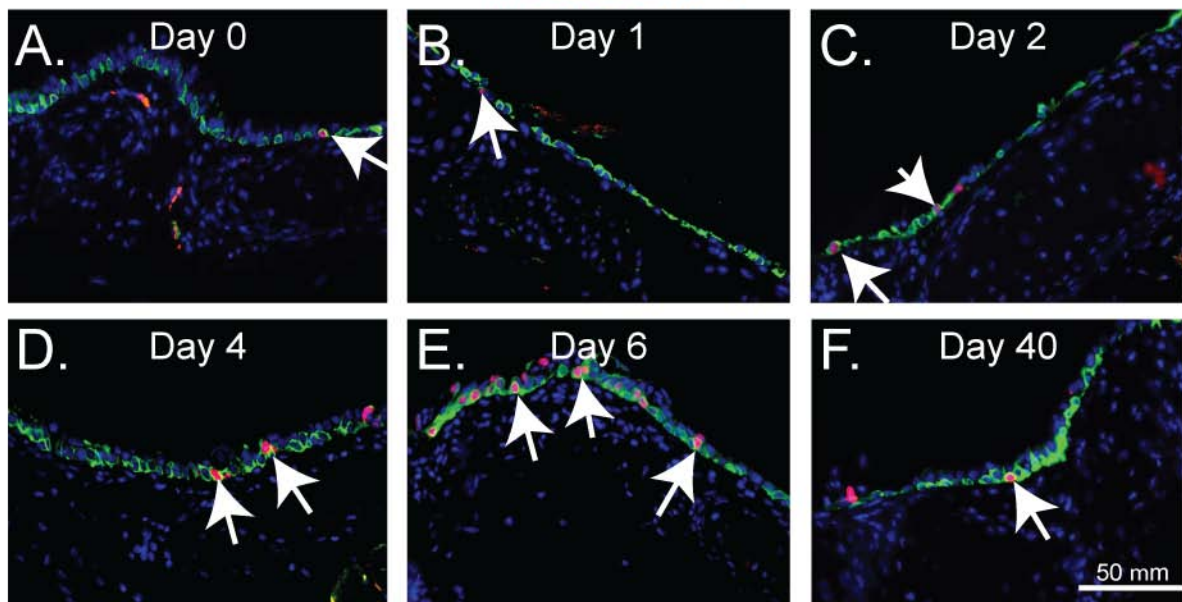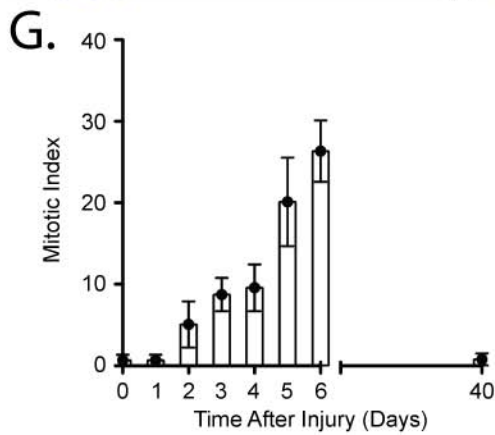

# Supplemental Figure 3

A.

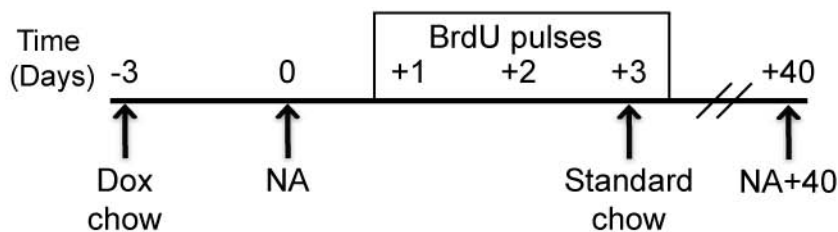

B.

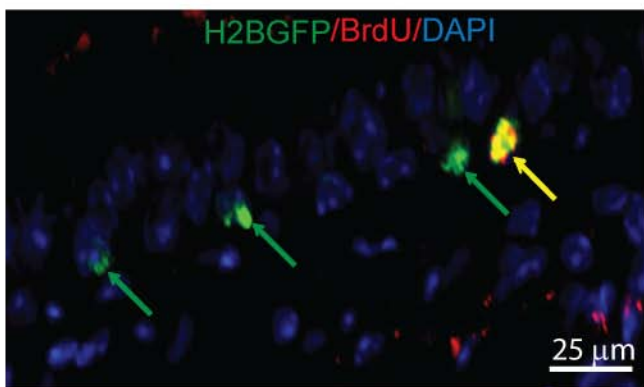

C.

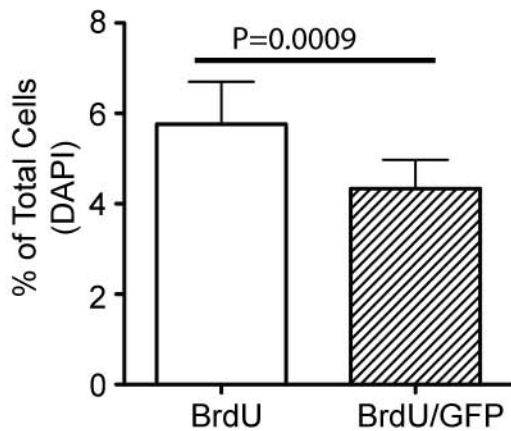

# Supplemental Figure 4

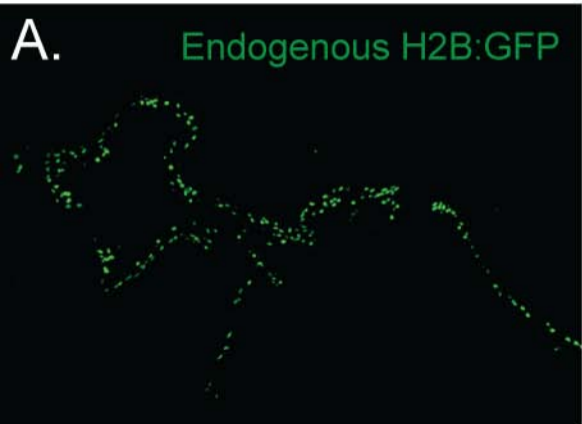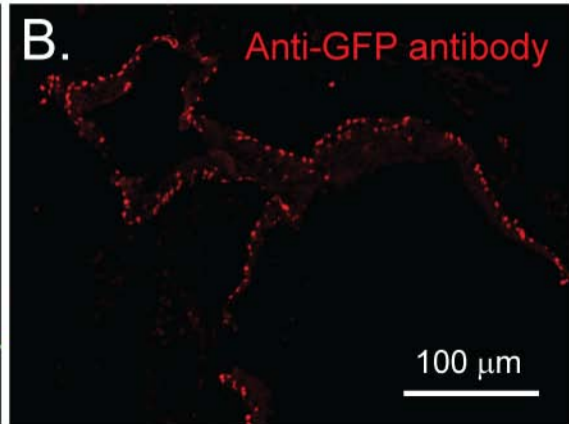

# Supplemental Figure 5.

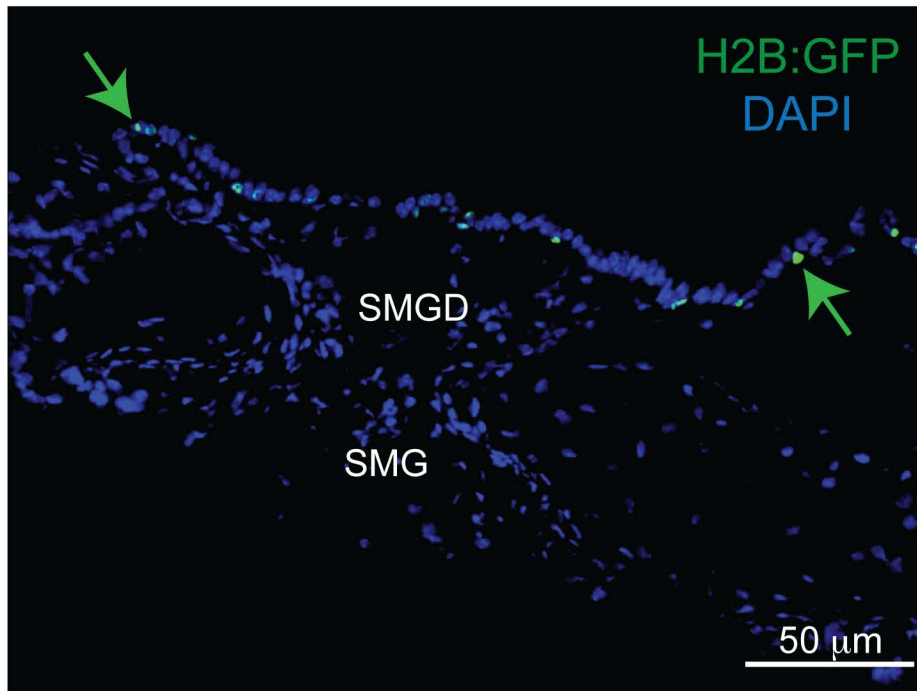

# Supplemental Figure 6

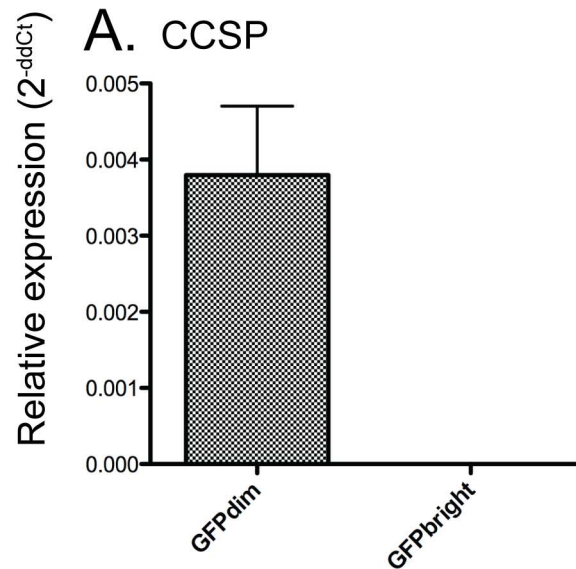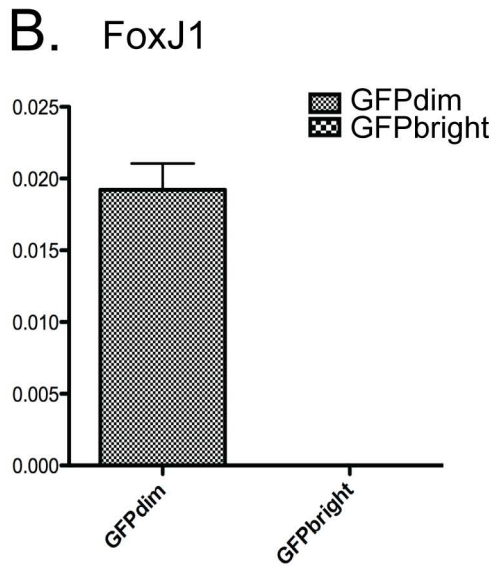

# Supplemental Figure 7

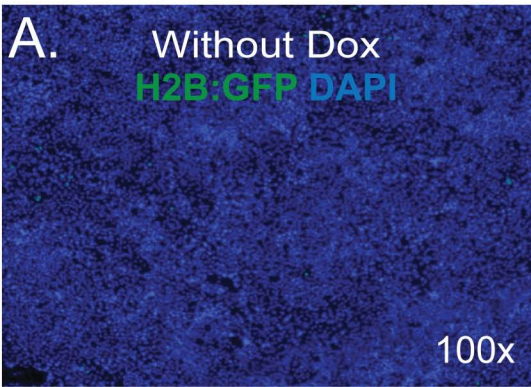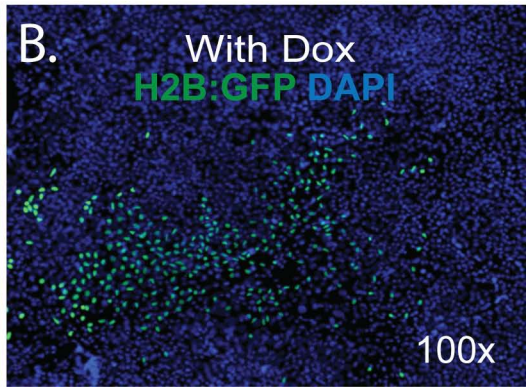

# Supplemental Figure 8

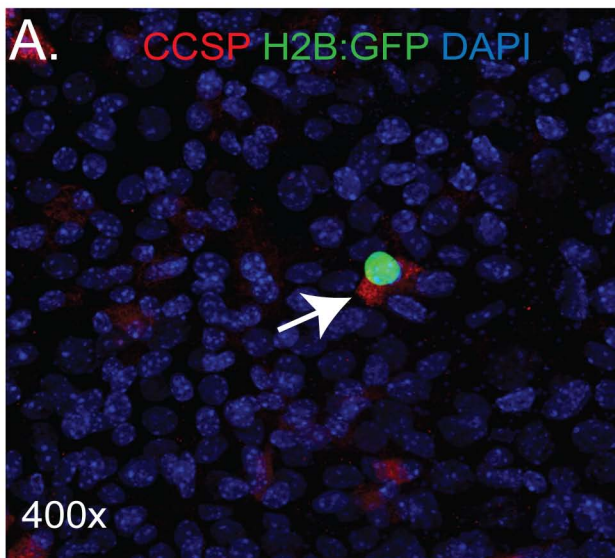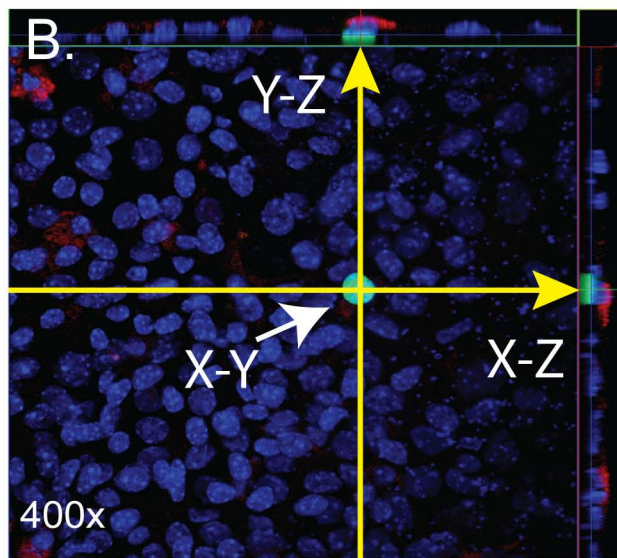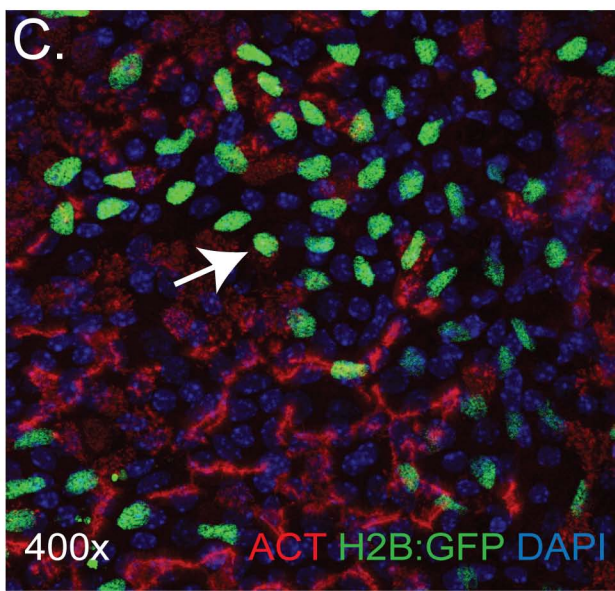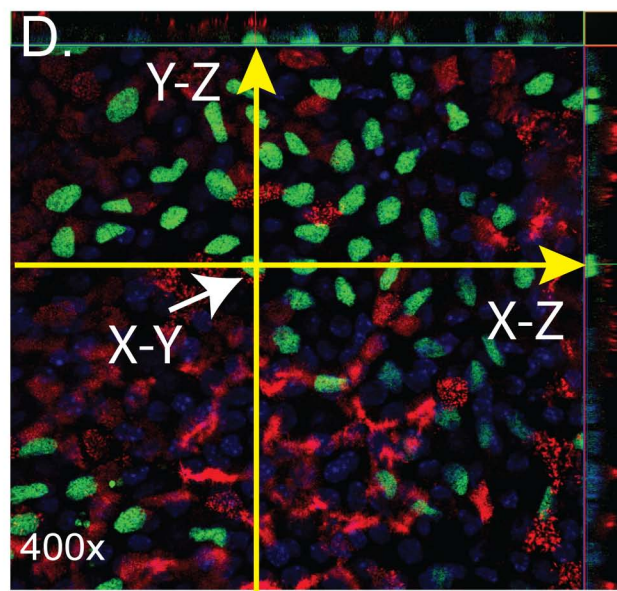



# Supplemental figure 9

A.

TSC-Clone  
(TOPGal-C57BI/6 congenic)

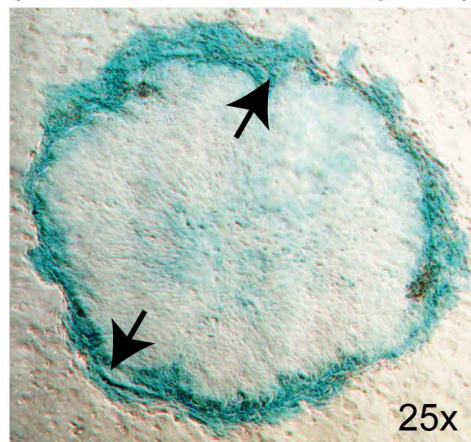

B.

$\beta$ -catenin

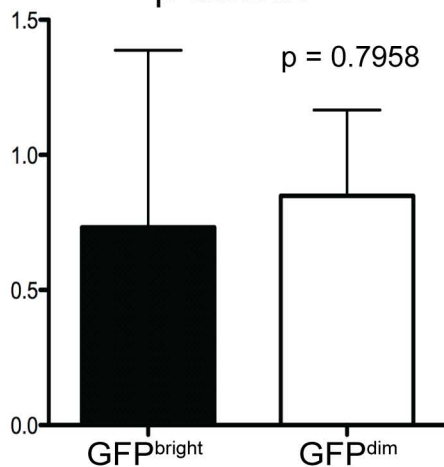

C.

Cyclin D1

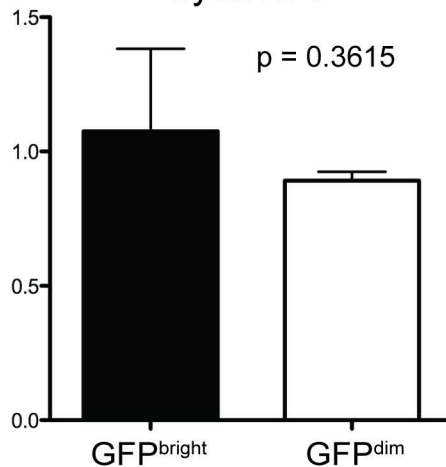

D.

Axin-2

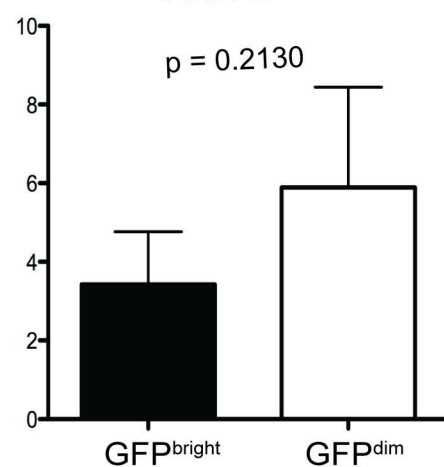

E.

APC

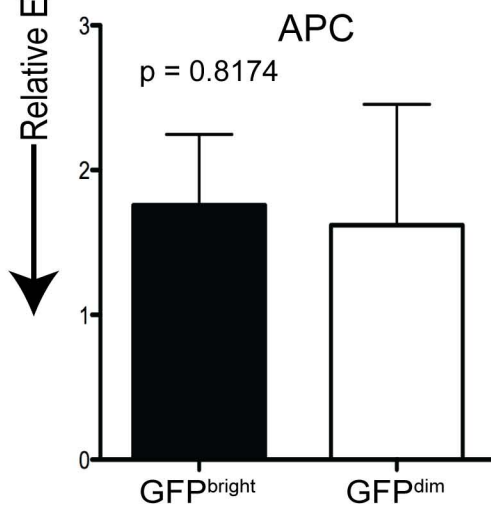

F.

DKK2

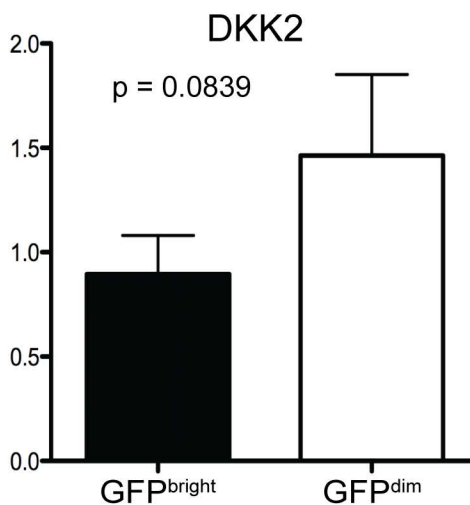

G.

GSK3 $\beta$

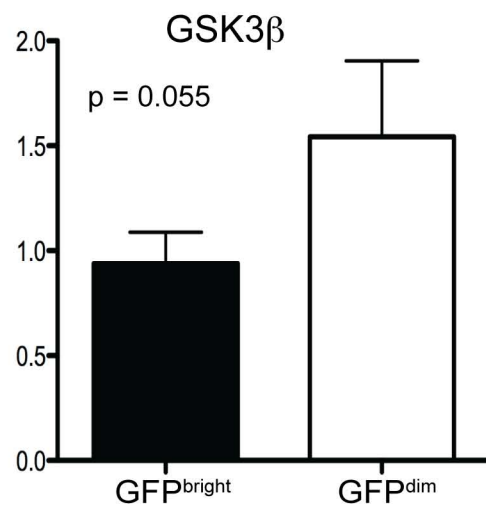

Relative Expression ( $2^{-\Delta\Delta Ct}$ )
